# Supplementary material for: Predictive Modeling for Voxel-Based Quantification of Imaging-Based Subtypes of Pancreatic Ductal Adenocarcinoma (PDAC): A Multi-Institutional Study
Source: MDPI journal article supplement (doi:10.3390/cancers12123656), 2020-12-05
Supplement: s1 [file s1]

# Supplementary Materials: Predictive Modeling for Voxel-based Quantification of Imaging-based Subtypes of Pancreatic Ductal Adenocarcinoma (PDAC): A Multi-Institutional study

Mohamed Zaid, Lauren Widmann, Annie Dai, Kevin Sun, Jie Zhang, Jun Zhao, Mark Hurd, Gauri R Varadhachary, Robert A. Wolff, Anirban Maitr, Matthew HG Katz, Joseph M Herman<sup>1</sup>, Huamin Wang, Michael V Knopp, Terence M Williams, Priya Bhosale, Eric P Tamm and Eugene J Koay

$$\begin{aligned} \text{linear combination of response level (lin)} &= 2.45 + [-0.85 \times \text{PV-NPP}] + [-0.41 \times \text{AR-NPP}] \\ \text{probability of high q-delta} &= 1 / (1 + \text{Exp}(-\text{lin})) \\ \text{probability of low q-delta} &= 1 / (1 + \text{Exp}(\text{lin})) \end{aligned}$$

**Figure 1.** The probability equation used to classify the response level into high versus low q-delta. Abbreviations: AR NPP: enhancement at arterial phase normalized to normal pancreas parenchyma; PV NPP: enhancement at portovenous phase normalized to normal pancreas parenchyma.

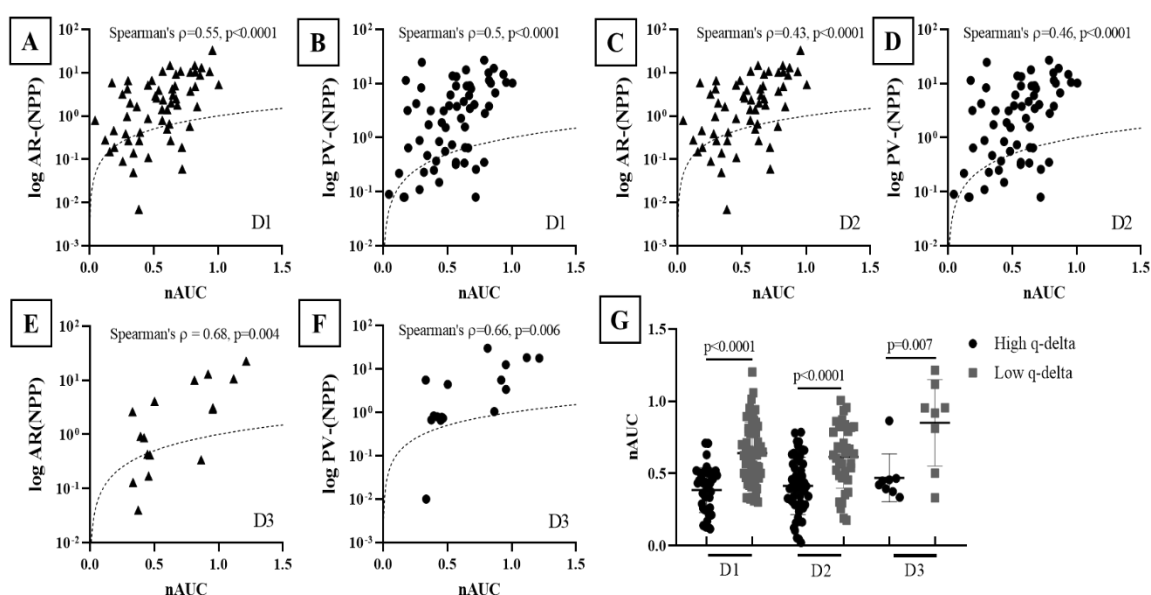

**Figure 2.** The association between nAUC and tumor enhancement in D1: training set (A,B), D2: internal validation set (C,D) and D3: external validation set (E-F). The association between nAUC and q-delta in the three studied cohorts (G). Abbreviations: (AR)-NPP: enhancement at arterial phase normalized to normal pancreas parenchyma; nAUC: normalized area under the curve; (PV)-NPP: enhancement at portovenous phase normalized to normal pancreas parenchyma.

**Table S1.** Intra- and inter-rater agreement of DSC and ICC in 30 patients.

| Variable                                       |                     |              | Average | Lower<br>95%CI | Upper<br>95%CI | Agreement<br>Interpretation |
|------------------------------------------------|---------------------|--------------|---------|----------------|----------------|-----------------------------|
| Dice similarity<br>coefficient (DSC)           | Intra-observer      | All          | 0.9     | 0.88           | 0.92           | Good                        |
|                                                |                     | High q-delta | 0.93    | 0.9            | 0.96           | Good                        |
|                                                |                     | Low q-delta  | 0.87    | 0.85           | 0.89           | Good                        |
|                                                | Inter-observer      | All          | 0.86    | 0.82           | 0.89           | Good                        |
|                                                |                     | High q-delta | 0.89    | 0.82           | 0.95           | Good                        |
|                                                |                     | Low q-delta  | 0.83    | 0.80           | 0.86           | Good                        |
| Intraclass<br>Correlation<br>Coefficient (ICC) | Intrarater (AR-NPP) |              | 0.95    | 0.92           | 0.97           | Excellent                   |
|                                                | Interrater (AR-NPP) |              | 0.84    | 0.71           | 0.91           | Good                        |
|                                                | Intrarater (PV-NPP) |              | 0.93    | 0.87           | 0.96           | Excellent                   |
|                                                | Interrater (PV-NPP) |              | 0.90    | 0.82           | 0.95           | Excellent                   |

AR: Arterial phase ; PV: Portovenous phase; NPP: Normal pancreatic parenchyma.

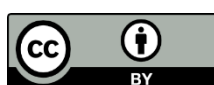

© 2020 by the authors. Licensee MDPI, Basel, Switzerland. This article is an open access article distributed under the terms and conditions of the Creative Commons Attribution (CC BY) license (<http://creativecommons.org/licenses/by/4.0/>).
